# Supplementary material for: Prevalence of Atopic Dermatitis in Korean Children Based on Data From the 2008-2011 Korean National Health and Nutrition Examination Survey
Source: PubMed Central journal article supplement — Allergy Asthma Immunol Res. 2015 Jul 30;8(1):79–83. doi: 10.4168/aair.2016.8.1.79 (PMC4695412; doi:10.4168/aair.2016.8.1.79), 2015-07-30
Supplement: aair-8-79-s001.pdf [file aair-8-79-s001.pdf]

**Supplement data Table 1.** Prevalence of AD in Korean children according to place of residence in details

| Place of residence | Total AD group | <i>P</i> value | Male AD group | <i>P</i> value | Female AD group | <i>P</i> value |
|--------------------|----------------|----------------|---------------|----------------|-----------------|----------------|
|                    |                | 0.5003         |               | 0.089          |                 | 0.0286         |
| Seoul              | 213 (13.49)    |                | 126 (14.99)   |                | 87 (12)         |                |
| Busan              | 70 (17.24)     |                | 42 (16.01)    |                | 28 (15.97)      |                |
| Daegu              | 75 (16.08)     |                | 35 (14.49)    |                | 40 (16.97)      |                |
| Incheon            | 79 (12.23)     |                | 44 (13.42)    |                | 35 (10.04)      |                |
| Gwangju            | 67 (16.28)     |                | 27 (14.71)    |                | 40 (17.83)      |                |
| Daejeon            | 49 (13.5)      |                | 20 (10)       |                | 29 (18.91)      |                |
| Ulsan              | 31 (9.55)      |                | 18 (8.29)     |                | 13 (10.46)      |                |
| Gyeonggi-do        | 314 (13.41)    |                | 176 (13.87)   |                | 138 (12.96)     |                |
| Gangwon-do         | 30 (13.48)     |                | 17 (14.51)    |                | 13 (12.24)      |                |
| Chungcheongbuk-do  | 33 (11.49)     |                | 14 (9.04)     |                | 19 (13.86)      |                |
| Chungcheongnam-do  | 48 (9.13)      |                | 20 (7.26)     |                | 28 (13.22)      |                |
| Jeollabuk-do       | 43 (10.87)     |                | 21 (10.02)    |                | 22 (11.95)      |                |
| Jeollanam-do       | 55 (13.35)     |                | 23 (9.51)     |                | 32 (17.5)       |                |
| Gyeongsangbuk-do   | 72 (13.98)     |                | 40 (16.23)    |                | 32 (11.73)      |                |
| Gyeongsangnam-do   | 69 (14.47)     |                | 28 (9.26)     |                | 41 (19.8)       |                |
| Jeju-do            | 37 (17.67)     |                | 21 (11.64)    |                | 16 (21.14)      |                |
